# Supplementary material
Source: HighWire-hosted journal article supplement (https://jnm.snmjournals.org/highwire/filestream/94226/field_highwire_adjunct_files/0/Supplemental_Newsline_Tables.pdf)
Supplement: Supplemental_Newsline_Tables.pdf [file Supplemental_Newsline_Tables.pdf]

TABLE 1. Count of providers by accreditation level, organizational type and geographical region

| Geographical region | Northern<br>N=14 |        | Central<br>N=12 |        | Southern<br>N=12 |        | Eastern<br>N=2 |         | Total<br>N=40 |        |
|---------------------|------------------|--------|-----------------|--------|------------------|--------|----------------|---------|---------------|--------|
|                     | n                | (%)    | n               | (%)    | n                | (%)    | n              | (%)     | n             | (%)    |
| Accreditation level |                  |        |                 |        |                  |        |                |         |               |        |
| Medical center      | 8                | (57.1) | 4               | (33.3) | 5                | (41.7) | 1              | (50.0)  | 18            | (45.0) |
| Regional hospital   | 5                | (35.7) | 5               | (41.7) | 7                | (58.3) | 1              | (50.0)  | 18            | (45.0) |
| District hospital   | 1                | (7.1)  | 3               | (25.0) | 0                | (0.0)  | 0              | (0.0)   | 4             | (10.0) |
| Organizational type |                  |        |                 |        |                  |        |                |         |               |        |
| Public              | 4                | (28.6) | 1               | (8.3)  | 2                | (16.7) | 0              | (0.0)   | 7             | (17.5) |
| Non-profit          | 10               | (71.4) | 5               | (41.7) | 8                | (66.7) | 2              | (100.0) | 25            | (62.5) |
| For-profit          | 0                | (0.0)  | 6               | (50.0) | 2                | (16.7) | 0              | (0.0)   | 8             | (20.0) |

TABLE 2. Frequency of selected cancers by geographical region

| Geographical region | Northern<br>N=4,585 |        | Central<br>N=1,843 |        | Southern<br>N=1,605 |        | Eastern<br>N=488 |       | Total<br>N=7,791 |       |
|---------------------|---------------------|--------|--------------------|--------|---------------------|--------|------------------|-------|------------------|-------|
|                     | n                   | (%)    | n                  | (%)    | n                   | (%)    | n                | (%)   | n                | (%)   |
| Type of cancer      |                     |        |                    |        |                     |        |                  |       |                  |       |
| Head & neck cancers | 742                 | (48.6) | 334                | (21.9) | 364                 | (23.9) | 86               | (5.6) | 1,526            | (100) |
| Breast cancer       | 1,402               | (58.0) | 508                | (21.0) | 399                 | (16.5) | 107              | (4.4) | 2,416            | (100) |
| Colorectal cancer   | 1,209               | (59.1) | 454                | (22.2) | 272                 | (13.3) | 110              | (5.4) | 2,045            | (100) |
| Esophageal cancer   | 105                 | (50.0) | 49                 | (23.3) | 38                  | (18.1) | 18               | (8.6) | 210              | (100) |
| NSC lung cancer *   | 547                 | (46.9) | 287                | (24.6) | 256                 | (22.0) | 76               | (6.5) | 1,166            | (100) |
| Lymphoma            | 245                 | (57.2) | 97                 | (22.7) | 67                  | (15.7) | 19               | (4.4) | 428              | (100) |

\* NSC lung cancer indicates non-small cell lung cancer.

TABLE 3. Univariate analysis of patient and provider characteristics by cancer type between patients with and without PET examination

| Cancer type             | Head & neck cancers |    |     |    | Breast cancer |       |     |     |     | Colorectal cancer |       |    |     |     | Esophageal cancer |     |       |    |    | NSC lung cancer * |     |    |      |    | Lymphoma |     |    |    |      |   |   |  |  |  |      |
|-------------------------|---------------------|----|-----|----|---------------|-------|-----|-----|-----|-------------------|-------|----|-----|-----|-------------------|-----|-------|----|----|-------------------|-----|----|------|----|----------|-----|----|----|------|---|---|--|--|--|------|
|                         | No                  |    | Yes |    | p             | No    |     | Yes |     |                   | p     | No |     | Yes |                   |     | p     | No |    | Yes               |     |    | p    | No |          | Yes |    |    | p    |   |   |  |  |  |      |
|                         | n                   | %  | n   | %  |               | n     | %   | n   | %   | n                 |       | %  | n   | %   | n                 | %   |       | n  | %  | n                 | %   | n  |      | %  | n        | %   | n  | %  |      | n | % |  |  |  |      |
| All                     | 1,050               | 87 | 156 | 13 |               | 1,666 | 93  | 117 | 7   |                   | 1,184 | 90 | 135 | 10  |                   | 123 | 78    | 35 | 22 |                   | 740 | 86 | 124  | 14 |          | 279 | 80 | 69 | 20   |   |   |  |  |  |      |
| Patient characteristics |                     |    |     |    |               |       |     |     |     |                   |       |    |     |     |                   |     |       |    |    |                   |     |    |      |    |          |     |    |    |      |   |   |  |  |  |      |
| Gender                  |                     |    |     |    | 0.21          |       |     |     |     |                   | 1     |    |     |     |                   |     | 0.83  |    |    |                   |     |    | 0.16 |    |          |     |    |    | 0.09 |   |   |  |  |  | 0.7  |
| Female                  | 213                 | 20 | 25  | 16 |               | 1,660 | 100 | 117 | 100 |                   | 497   | 42 | 58  | 43  |                   | 8   | 6     | 5  | 14 |                   | 263 | 35 | 54   | 44 |          | 108 | 39 | 25 | 36   |   |   |  |  |  |      |
| Male                    | 837                 | 80 | 131 | 84 |               | 6     | 0   | 0   | 0   |                   | 687   | 58 | 77  | 57  |                   | 115 | 94    | 30 | 86 |                   | 477 | 65 | 70   | 56 |          | 171 | 61 | 44 | 64   |   |   |  |  |  |      |
| Age (years)             |                     |    |     |    | 0.3           |       |     |     |     |                   | 0.69  |    |     |     |                   |     | 0.003 |    |    |                   |     |    | 0.55 |    |          |     |    |    | 0    |   |   |  |  |  | 0.18 |
| < 55                    | 535                 | 51 | 85  | 54 |               | 984   | 59  | 69  | 59  |                   | 360   | 22 | 29  | 21  |                   | 44  | 36    | 12 | 34 |                   | 115 | 15 | 30   | 24 |          | 119 | 43 | 38 | 55   |   |   |  |  |  |      |
| 55 - 64                 | 246                 | 23 | 40  | 26 |               | 397   | 24  | 31  | 27  |                   | 233   | 20 | 43  | 32  |                   | 28  | 23    | 11 | 32 |                   | 152 | 21 | 35   | 28 |          | 51  | 18 | 10 | 15   |   |   |  |  |  |      |
| ≥ 65                    | 269                 | 26 | 31  | 20 |               | 285   | 17  | 17  | 14  |                   | 691   | 58 | 63  | 47  |                   | 51  | 41    | 12 | 34 |                   | 473 | 64 | 59   | 48 |          | 109 | 39 | 21 | 30   |   |   |  |  |  |      |
| Income †                |                     |    |     |    | 0.28          |       |     |     |     |                   | 0.94  |    |     |     |                   |     | 0.51  |    |    |                   |     |    | 0.27 |    |          |     |    |    | 0.03 |   |   |  |  |  | 0.96 |
| < 10,000                | 405                 | 39 | 54  | 35 |               | 714   | 43  | 52  | 45  |                   | 633   | 54 | 77  | 57  |                   | 51  | 41    | 17 | 49 |                   | 411 | 56 | 58   | 47 |          | 153 | 55 | 37 | 54   |   |   |  |  |  |      |
| 10,000-19,999           | 340                 | 32 | 47  | 30 |               | 379   | 23  | 26  | 22  |                   | 309   | 26 | 29  | 21  |                   | 53  | 43    | 10 | 28 |                   | 209 | 28 | 34   | 27 |          | 76  | 27 | 20 | 29   |   |   |  |  |  |      |
| ≥ 20,000                | 305                 | 29 | 55  | 35 |               | 573   | 34  | 39  | 33  |                   | 242   | 20 | 29  | 22  |                   | 19  | 16    | 8  | 23 |                   | 120 | 16 | 32   | 26 |          | 50  | 18 | 12 | 17   |   |   |  |  |  |      |
| Region                  |                     |    |     |    | 0.49          |       |     |     |     |                   | 0.01  |    |     |     |                   |     | 0.36  |    |    |                   |     |    | 0.19 |    |          |     |    |    | 0.01 |   |   |  |  |  | 0.95 |
| Northern                | 556                 | 53 | 73  | 47 |               | 1,027 | 61  | 56  | 48  |                   | 755   | 63 | 87  | 64  |                   | 59  | 48    | 21 | 60 |                   | 378 | 51 | 70   | 57 |          | 168 | 60 | 42 | 61   |   |   |  |  |  |      |
| Central                 | 228                 | 22 | 37  | 24 |               | 344   | 21  | 30  | 26  |                   | 247   | 21 | 23  | 17  |                   | 34  | 28    | 6  | 17 |                   | 182 | 25 | 25   | 20 |          | 59  | 21 | 14 | 20   |   |   |  |  |  |      |
| Southern                | 217                 | 21 | 39  | 25 |               | 234   | 14  | 21  | 18  |                   | 125   | 11 | 20  | 15  |                   | 21  | 17    | 3  | 9  |                   | 144 | 19 | 15   | 12 |          | 40  | 14 | 9  | 13   |   |   |  |  |  |      |
| Eastern                 | 48                  | 4  | 7   | 4  |               | 61    | 4   | 10  | 8   |                   | 57    | 5  | 5   | 4   |                   | 9   | 7     | 5  | 14 |                   | 36  | 5  | 14   | 11 |          | 12  | 5  | 4  | 6    |   |   |  |  |  |      |

\* NSC lung cancer indicates non-small cell lung cancer.

† Income indicates monthly income in Taiwan New Dollars (TWD). One US Dollar is currently worth approximately 32 TWD.

TABLE 3 (continued). Univariate analysis of patient and provider characteristics by cancer type between patients with and without PET examination

| Cancer type         | Head & neck cancers |    |     |    | Breast cancer |    |     |    | Colorectal cancer |    |     |    | Esophageal cancer |    |     |     | NSC lung cancer |    |     |    | Lymphoma |    |    |     | p       |
|---------------------|---------------------|----|-----|----|---------------|----|-----|----|-------------------|----|-----|----|-------------------|----|-----|-----|-----------------|----|-----|----|----------|----|----|-----|---------|
|                     | No                  |    | Yes |    | No            |    | Yes |    | No                |    | Yes |    | No                |    | Yes |     | No              |    | Yes |    |          |    |    |     |         |
|                     | n                   | %  | n   | %  | n             | %  | n   | %  | n                 | %  | n   | %  | n                 | %  | n   | %   | n               | %  | n   | %  |          |    |    |     |         |
| Clinical features   |                     |    |     |    |               |    |     |    |                   |    |     |    |                   |    |     |     |                 |    |     |    |          |    |    |     |         |
| Metastasis          |                     |    |     |    | 0.45          |    |     |    | 0.66              |    |     |    | 1                 |    |     |     | 0.52            |    |     |    | 0.88     |    |    |     | 1       |
| No                  | 1,037               | 99 | 153 | 98 | 1,657         | 99 | 116 | 99 | 1,175             | 99 | 134 | 99 | 104               | 85 | 28  | 80  | 733             | 99 | 123 | 99 | 276      | 99 | 69 | 100 |         |
| Yes                 | 13                  | 1  | 3   | 2  | 9.0           | 1  | 1.0 | 1  | 9.0               | 1  | 1.0 | 1  | 19                | 15 | 7   | 20  | 7               | 1  | 1   | 1  | 3        | 1  | 0  | 0   |         |
| Multiple cancers    |                     |    |     |    | 0.41          |    |     |    | 0.02              |    |     |    | 0.87              |    |     |     | 1               |    |     |    | 0        |    |    |     | 0.96    |
| No                  | 926                 | 88 | 134 | 86 | 1,600         | 96 | 107 | 91 | 1,020             | 86 | 117 | 87 | 121               | 98 | 35  | 100 | 681             | 92 | 104 | 84 | 215      | 77 | 53 | 77  |         |
| Yes                 | 124                 | 12 | 22  | 14 | 66            | 4  | 10  | 9  | 164               | 14 | 18  | 13 | 2                 | 2  | 0   | 0   | 59              | 8  | 20  | 16 | 64       | 23 | 16 | 23  |         |
| Comorbidities       |                     |    |     |    | 0.53          |    |     |    | 0.50              |    |     |    | 0.97              |    |     |     | 0.24            |    |     |    | 0.94     |    |    |     | 0.35    |
| No                  | 660                 | 63 | 94  | 60 | 1,073         | 64 | 79  | 67 | 524               | 44 | 60  | 44 | 70                | 57 | 16  | 46  | 260             | 35 | 44  | 35 | 169      | 61 | 46 | 67  |         |
| Yes                 | 390                 | 67 | 62  | 40 | 593           | 36 | 38  | 33 | 660               | 56 | 75  | 56 | 53                | 43 | 19  | 54  | 480             | 65 | 80  | 65 | 110      | 39 | 23 | 33  |         |
| Accreditation level |                     |    |     |    | <0.0001       |    |     |    | 0.0004            |    |     |    | <0.0001           |    |     |     | 0.22            |    |     |    | <0.0001  |    |    |     | <0.0001 |
| Medical center      | 896                 | 85 | 113 | 72 | 1,316         | 79 | 76  | 65 | 993               | 84 | 89  | 66 | 111               | 90 | 29  | 83  | 629             | 85 | 85  | 69 | 239      | 86 | 43 | 62  |         |
| Non-medical ctr.    | 154                 | 15 | 43  | 28 | 350           | 21 | 41  | 35 | 191               | 16 | 46  | 34 | 12                | 10 | 6   | 17  | 111             | 15 | 39  | 31 | 40       | 14 | 26 | 38  |         |
| Organizational type |                     |    |     |    | <0.0001       |    |     |    | 0.0005            |    |     |    | 0.67              |    |     |     | 0.93            |    |     |    | 0.19     |    |    |     | 0.31    |
| Public              | 544                 | 52 | 48  | 30 | 641           | 38 | 34  | 29 | 459               | 39 | 48  | 36 | 59                | 48 | 18  | 51  | 362             | 49 | 51  | 41 | 136      | 49 | 32 | 46  |         |
| Non-profit          | 493                 | 47 | 107 | 69 | 994           | 60 | 75  | 64 | 691               | 58 | 84  | 62 | 61                | 50 | 17  | 49  | 369             | 50 | 70  | 57 | 135      | 48 | 37 | 54  |         |
| For-profit          | 13                  | 1  | 1   | 1  | 31            | 2  | 8   | 7  | 34                | 3  | 3   | 2  | 3                 | 2  | 0   | 0   | 9               | 1  | 3   | 2  | 8        | 3  | 0  | 0   |         |

TABLE 4. Multivariate logistic regression of the likelihood of undergoing PET scan

| Independent variables                    | Odds ratio | (95% CI) *  |
|------------------------------------------|------------|-------------|
| <b>Patient characteristics</b>           |            |             |
| Male gender (vs. Female)                 | 1.02       | (0.82-1.25) |
| Age, year (vs. $\geq 65$ )               |            |             |
| < 55                                     | 1.51       | (1.20-1.90) |
| 55 - 64                                  | 1.64       | (1.30-2.08) |
| Income (vs. $\geq 20,000$ ) †            |            |             |
| < 10,000                                 | 1.03       | (0.83-1.29) |
| 10,000 - 19,999                          | 0.86       | (0.67-1.10) |
| Region (vs. Northern)                    |            |             |
| Central                                  | 1.10       | (0.88-1.39) |
| Southern                                 | 0.95       | (0.74-1.23) |
| Eastern                                  | 1.68       | (1.18-2.38) |
| <b>Clinical features</b>                 |            |             |
| Multiple cancers (vs. One cancer only)   | 1.42       | (1.11-1.82) |
| Cancer type (vs. Breast cancer)          |            |             |
| Head & neck cancers                      | 2.29       | (1.69-3.11) |
| Colorectal cancer                        | 1.93       | (1.43-2.59) |
| Esophageal cancer                        | 4.89       | (3.05-7.83) |
| Non-small cell lung cancer               | 2.96       | (2.17-4.03) |
| Lymphoma                                 | 3.79       | (2.65-5.43) |
| <b>Provider characteristics</b>          |            |             |
| Accreditation level (vs. Medical center) |            |             |
| Regional/District hospital               | 2.56       | (2.05-3.21) |
| Organizational type (vs. Public)         |            |             |
| Non-profit                               | 1.05       | (0.86-1.29) |
| For-profit                               | 0.63       | (0.33-1.20) |

\* 95% CI indicates 95% confidence interval.

† Income indicates monthly income in Taiwan New Dollars (TWD). One US Dollar is currently worth approximately 32 TWD.
